# The Journal of Neuropsychiatry

## and Clinical Neurosciences

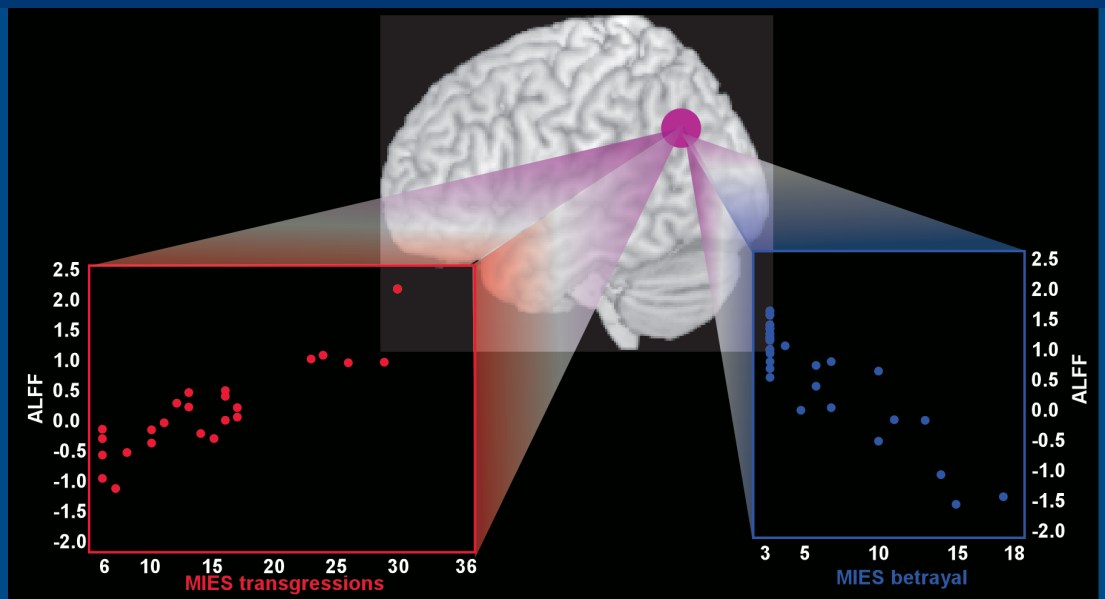

Poststroke Delirium Clinical Motor Subtypes: The PROspective  
Observational POLish Study (PROPOLIS)

Retrograde Autobiographical Memory From PTA Emergence to  
Six-Month Follow-Up in Moderate to Severe Traumatic Brain Injury

Repetitive Behaviors in Frontotemporal Dementia:  
Compulsions or Impulsions?

Anti-N-Methyl-D-Aspartate Receptor Encephalitis: A Review  
of Psychiatric Phenotypes and Management Considerations:  
A Report of the ANPA Committee on Research

Chronic Traumatic Encephalopathy: A Clinical Perspective
